# Supplementary material
Source: Springer Nature journal article supplement (https://www.springermedizin.de/resource/supplementary/12885_2008_1232_MOESM5_ESM.pdf/9471478)

**A**

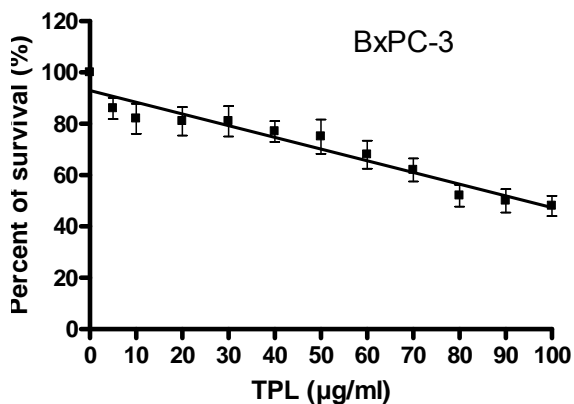

**B**

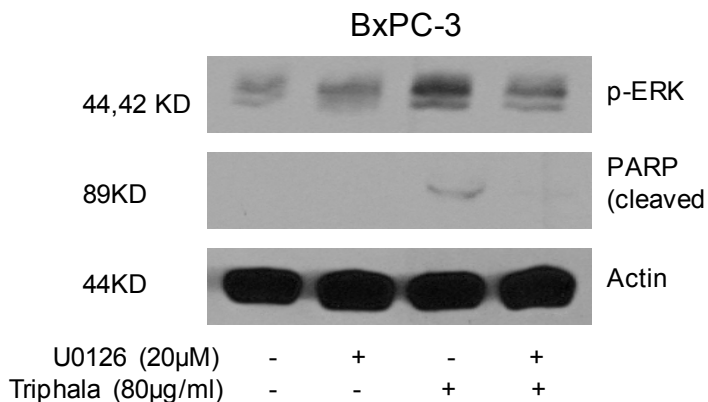

**C**

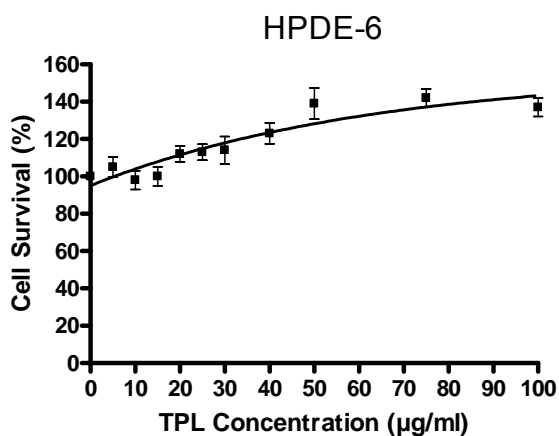

**D**

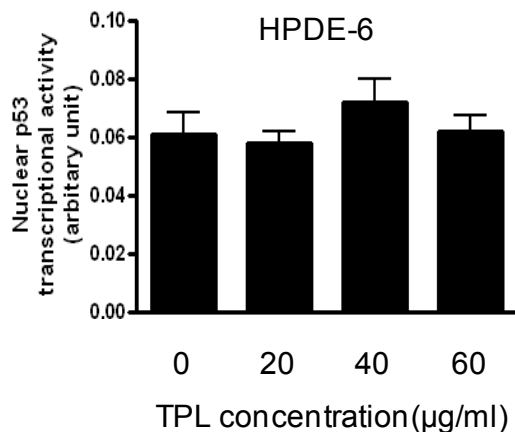

**E**

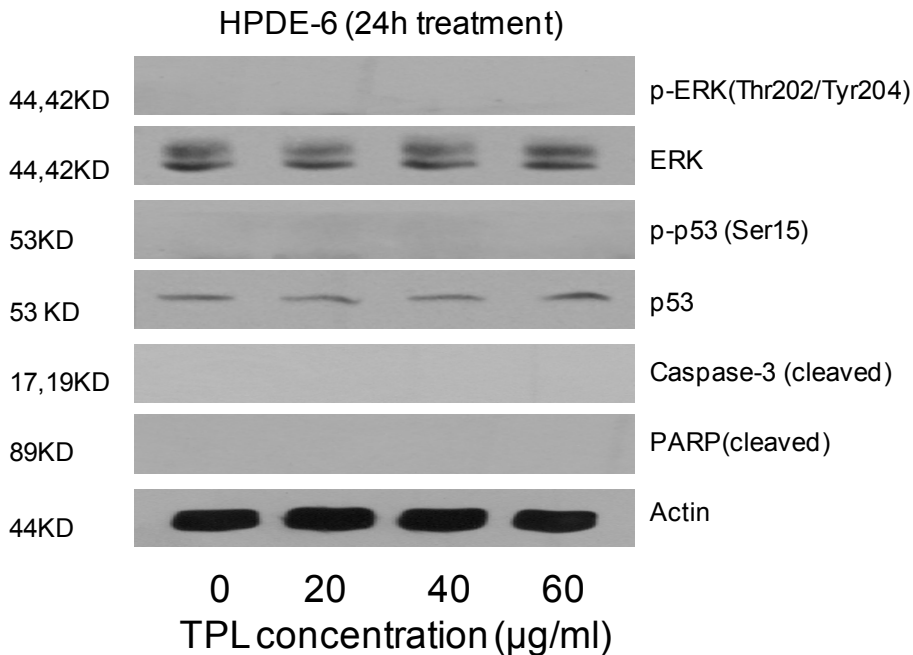

Supplement: MOESM5 [file 9471478]
